# Supplementary material for: The impact of synoptic meteorology on observed surface heat fluxes over the Southern Ocean
Source: Copernicus journal article supplement (doi:10.5194/wcd-6-1797-2025), 2025-12-10
Supplement: Supplementary file 1 [file wcd-6-1797-2025-supplement.pdf]

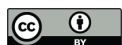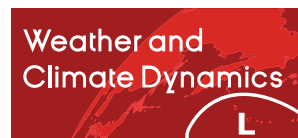

Open Access

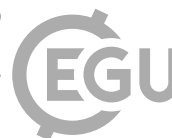

*Supplement of*

## **The impact of synoptic meteorology on observed surface heat fluxes over the Southern Ocean**

**A. V. Sreenath et al.**

*Correspondence to:* A. V. Sreenath ([sreenath.av@monash.edu](mailto:sreenath.av@monash.edu))

The copyright of individual parts of the supplement might differ from the article licence.

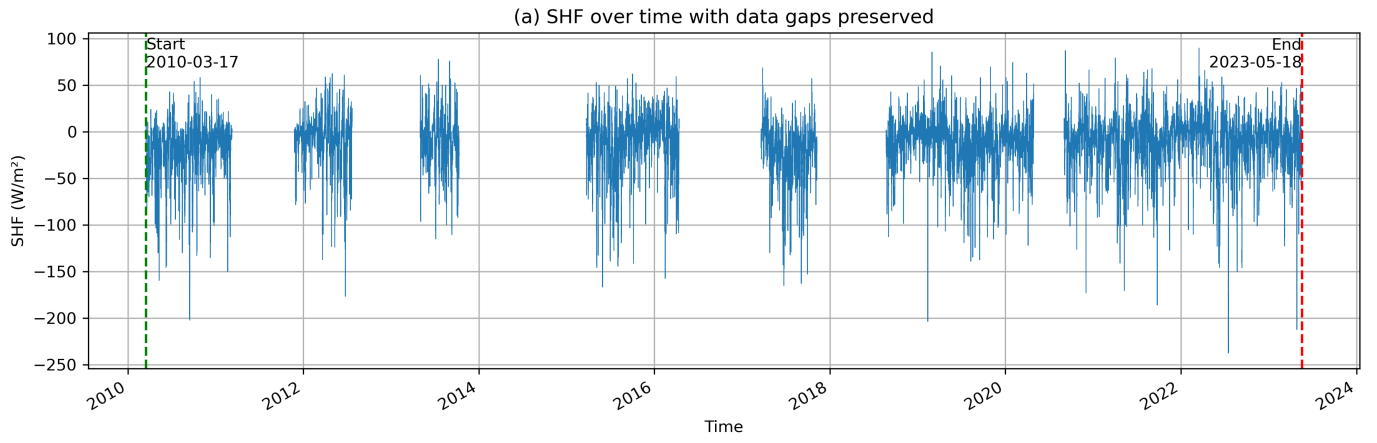

Figure S1: Time series of SHF derived from SOFS mooring data, with gaps indicating missing time steps in the dataset.

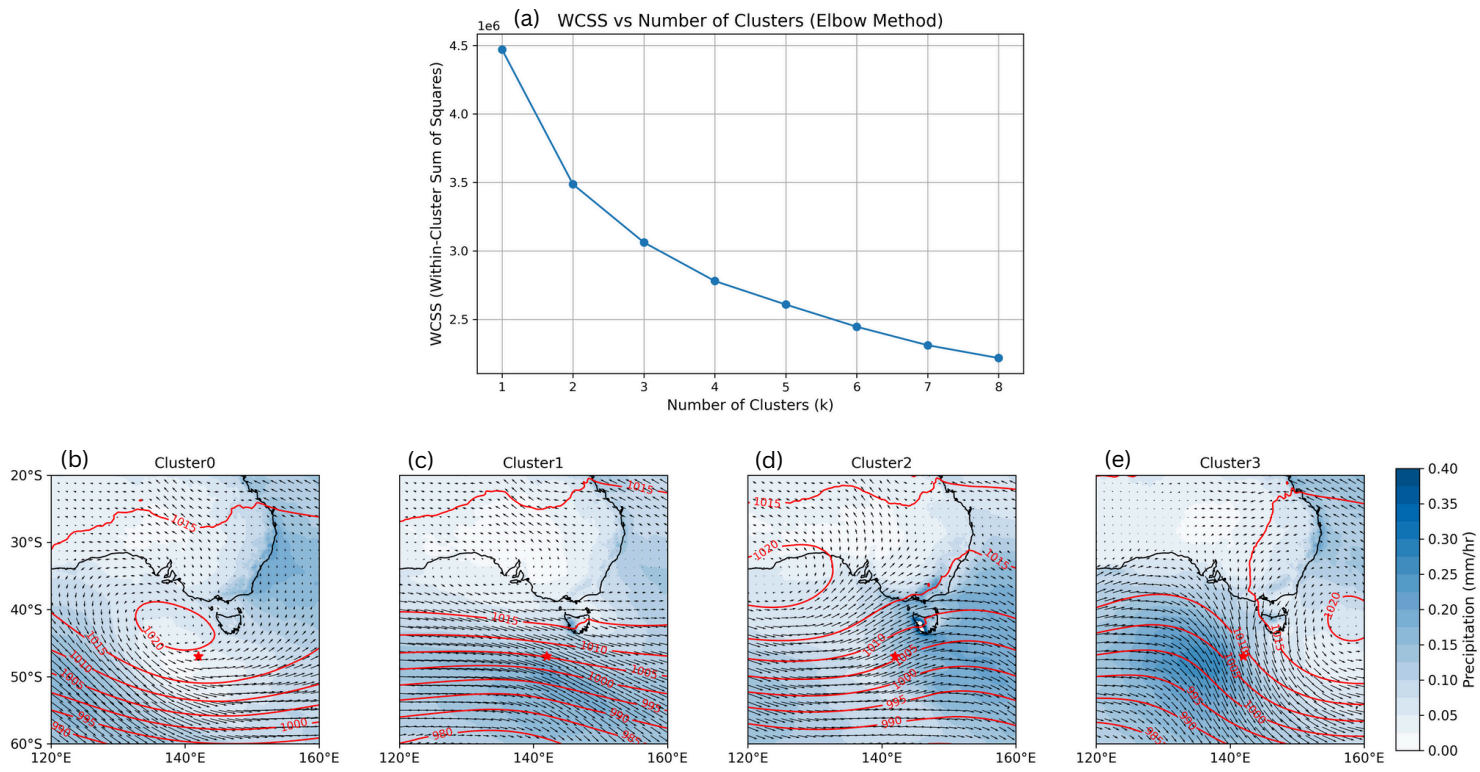

Figure S2: (a) Elbow method showing how the within-cluster sum of squares (WCSS) varies with the number of clusters. (b–e) Spatial distributions of mean sea-level pressure (contours; hPa), surface precipitation (shading; mm/hr), and 975-hPa winds (vectors) for the  $k = 4$  clustering at SOFS. The red marker denotes the SOFS buoy location.

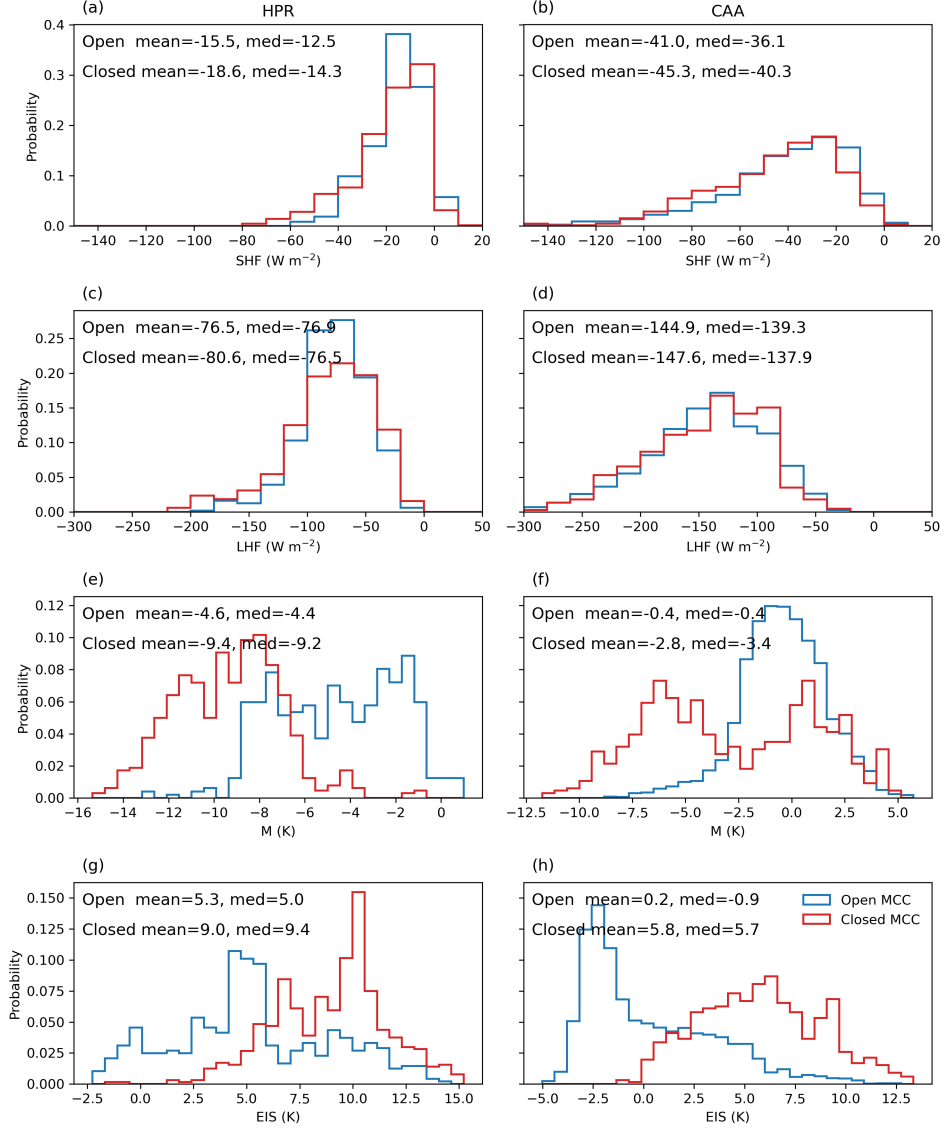

Figure S3: Probability distributions of (a, b) SHF ( $\text{Wm}^{-2}$ ), (c, d) LHF ( $\text{Wm}^{-2}$ ), (e, f) M-index (K), and (g, h) EIS (K) for HPR and CAA regimes when open and closed MCC are present. The left column shows HPR; the right column shows CAA. Solid blue lines denote open-MCC events, and solid red lines denote closed-MCC events at SOFS.

| Regime / Condition     | EIS < 0       | $0 \leq \text{EIS} \leq 5$ | EIS > 5       | Total         |
|------------------------|---------------|----------------------------|---------------|---------------|
| <b>Weather Regimes</b> |               |                            |               |               |
| HPR                    | 550           | 4,162                      | 8,582         | 13,294        |
| TBH                    | 74            | 1,659                      | 5,172         | 6,905         |
| Zonal                  | 3,545         | 8,114                      | 4,817         | 16,476        |
| Frontal                | 2,304         | 5,451                      | 1,190         | 8,945         |
| CAA                    | 5,528         | 5,220                      | 3,202         | 13,950        |
| <b>Total (Regimes)</b> | <b>12,001</b> | <b>24,606</b>              | <b>22,963</b> | <b>59,570</b> |
| <b>MCC Conditions</b>  |               |                            |               |               |
| Open MCC               | 2,541         | 1,558                      | 649           | 4,748         |
| Closed MCC             | 9             | 377                        | 1,257         | 1,643         |

Table S1: Number of occurrences of weather regimes and open and closed MCC cases within each EIS category at SOFS.
